# Supplementary material for: The potential effects of an extended alcohol withdrawal treatment programme on morbidity and mortality among inpatients in the German city of Bremen: a simulation study
Source: Subst Abuse Treat Prev Policy. 2020 Jan 2;15:1. doi: 10.1186/s13011-019-0249-7 (PMC6941395; doi:10.1186/s13011-019-0249-7)
Supplement: Supplementary file 1 — Additional file 1. R code to reproduce all findings reported in this study. (R 20 kb) [file 13011_2019_249_MOESM1_ESM.r]

##  ____________________________________________________________________________
##  ____________________________________________________________________________
##  ____________________________________________________________________________
##  ____________________________________________________________________________

rm(list=ls())

##  R code for Manuscript: 
##  "The potential effects of an extended alcohol withdrawal treatment programme on morbidity and mortality among inpatients in the German city of Bremen: A simulation study"
##  Author of code: Jakob Manthey

library ( data.table )
library ( xlsx )
library ( ggplot2 )
library ( Hmisc )

setwd("C:/Data.work/Publications/SATPP_QWT simulation/")


##  ____________________________________________________________________________
##  ____________________________________________________________________________
##  ____________________________________________________________________________
##  ____________________________________________________________________________

#   ::::::::::::::::::::::::::::::::::::::::
#   ::::::::::::::::::::::::::::::::::::::::
##  ALL INPUT DATA
#   ::::::::::::::::::::::::::::::::::::::::
#   ::::::::::::::::::::::::::::::::::::::::

##  OUTCOME 1: NUMBER OF HOSPITALIZATIONS
#   From Driessen et al: 7.3(+-11.3) vs 3.5(+-4.4)

input   <- list("hospn" = list(ke= c(mu = 7.3, var = 11.3^2, size = NA_real_), qe= c(mu = 3.5, var = 4.4^2, size = NA_real_) ) )

##  OUTCOME 2: LENGTH OF HOSPITALIZATIONS
#   From Driessen et al: 135.8(+-167.3) vs 55.7(+-75.4)

input["hospl"]   <- list(hospl = list(ke= c(mu = 135.8, var = 167.3^2, size = NA_real_), qe= c(mu = 55.7, var = 75.4^2, size = NA_real_) ) )

##  OUTCOME 3: NUMBER OF PEOPLE DEAD
#   From Bauer et al: 13 out of 90 (KE) vs 7 out of 92
##  ==> conservative estimates = all non-responders = non-abstainers.

input["dead"]   <- list(abst = list(ke= c(prop = 13/90), qe= c(prop = 7/92) ) )

##  OUTCOME 4: NUMBER OF PEOPLE ABSTINENT
#   From Bauer et al: 13 out of 90 (KE) vs 29 out of 92
##  ==> conservative estimates = all non-responders = non-abstainers.

input["abst"]   <- list(dead = list(ke= c(prop = 13/90), qe= c(prop = 29/92) ) )

##################  ######################  ######################  ######################

##  Hospital data for Baseline (ke = SWT, qe = QWT):
geno  <- data.table(scenario = "baseline", group = c("ke","qe","all"), N = c(1881, 170, 2051))

##  Data for other scenarios:
geno2   <- data.table(scenario = c("baseline","p10","p50","s25","s50"),
                      N.all = geno[group == "all", N],
                      N.ke = geno[group == "ke", N],
                      N.qe = geno[group == "qe", N])
geno2[, N.qe := ifelse(scenario == "p10", round(N.qe *1.1,0),
                       ifelse(scenario == "p50", round(N.qe *1.5,0),
                              ifelse(scenario == "s25", round(N.all * 0.25,0),
                                     ifelse(scenario == "s50", round(N.all * 0.5,0),N.qe ))))]
geno2[, N.ke := N.all - N.qe]
geno2   <- reshape(geno2, direction = "long", varying = c("N.all","N.ke","N.qe"), 
                   v.names = "N", timevar = "group", times = c("all","ke","qe"), idvar = "scenario" ) 

##  ____________________________________________________________________________
##  ____________________________________________________________________________
##  ____________________________________________________________________________
##  ____________________________________________________________________________

##  Descriptives:

##  Study 1 (Driessen et al., 1999):

##  Study 2 (Bauer et al., 1999):
bauer <- data.table(group = c("swt", "qwt"), n = c(90, 92),
                    females = c(20, 20), dependence.duration = c(11.6, 11.0))

    ##  mean dependence duration in sample:
        bauer[, wtd.mean(dependence.duration, n)] ## 11.3


##  ____________________________________________________________________________
##  ____________________________________________________________________________
##  ____________________________________________________________________________
##  ____________________________________________________________________________

#   ::::::::::::::::::::::::::::::::::::::::
#   ::::::::::::::::::::::::::::::::::::::::
##  PREPARE INPUT DATA
#   ::::::::::::::::::::::::::::::::::::::::
#   ::::::::::::::::::::::::::::::::::::::::

##  For negative binomial distribution, we need the following parameters:
    ##  n = from GENO/scenario
    ##  mu = given from study
    ##  size = shape parameter, can be derived from mu and var:

##  CALCULATE SIZE PARAMETER AS FOLLOWS
    #variance = mu + mu^2/size
    #size = mu^2 / (-mu + var)

##  ADD SIZE PARAMETER IN INPUT DATA:
CalcSize  <- function(x) {
  x[["size"]] <- x["mu"]^2 / (-x["mu"] + x["var"])
  return(x)
  }
input$hospn   <- lapply(input$hospn, CalcSize)
input$hospl   <- lapply(input$hospl, CalcSize)

##  ____________________________________________________________________________
##  ____________________________________________________________________________
##  ____________________________________________________________________________
##  ____________________________________________________________________________

#   ::::::::::::::::::::::::::::::::::::::::
#   ::::::::::::::::::::::::::::::::::::::::
##  GET SAMPLE DISTRIBUTIONS:
#   ::::::::::::::::::::::::::::::::::::::::
#   ::::::::::::::::::::::::::::::::::::::::

##  FUNCTION TO DRAW 10,000 SAMPLE DISTRIBUTIONS FOR EACH OUTCOME, GROUP, AND SCENARIO
v <- 1
g <- 1
s <- 1
i <- 1
vars <- c("hospn","hospl","abst","dead")
groups <- c("qe","ke")
scenarios <- c("baseline", "p10", "p50")
n_rep   <- 10000
input_data  <- copy(input)
N_data  <- copy(geno)

DistSample  <- function(input_data, N_data, vars = c("hospn","hospl","abst","dead"), 
                        groups = c("qe","ke"), n_rep = 10000, scenarios = c("baseline", "p10","p50"),
                        aSeed = 123456) {
  
  ##  1) extract relevant data from input
  for (v in 1:length(vars)) {
    for (g in 1:length(groups)) {
      extract <- input_data[[vars[v]]][groups[g]][[1]]
      assign(paste0("ext.",vars[v],".",groups[g]), extract)
    }
  }

  ##  2) create empty data sets for output
  output <- data.table(draw = NA_integer_, variable = NA_character_, group = NA_character_, scenario = NA_character_, 
                     mean = NA_integer_, var = NA_real_, sum = NA_integer_)
  
  for (v in 1:length(vars)) {
    for (g in 1:length(groups)) {
      for (s in 1:length(scenarios)) {
      
        dist.data <- data.table(draw = 1:n_rep, variable = vars[v], group = groups[g], scenario = scenarios[s], 
                         mean = NA_real_, var = NA_real_, sum = NA_real_)
        output  <- rbind(output, dist.data)
      
      }
    }
  }
  output  <- output[!is.na(draw)]  
  
  ##  3) Sample Distributions
  for (v in 1:length(vars)) {
    for (g in 1:length(groups)) {
      for (s in 1:length(scenarios)) {
        
        if(vars[v] %like% "hosp"){
          set.seed(aSeed)
          for (i in 1:n_rep){
            
            dist  <- rnbinom(n = N_data[group == groups[g] & scenario == scenarios[s]]$N, 
                             size = input_data[[vars[v]]][groups[g]][[1]][["size"]], 
                             mu = input_data[[vars[v]]][groups[g]][[1]][["mu"]])
            output[variable == vars[v] & group == groups[g] & scenario == scenarios[s] & draw == i, "mean"] <- mean(dist)
            output[variable == vars[v] & group == groups[g] & scenario == scenarios[s] & draw == i, "var"] <- var(dist)
            output[variable == vars[v] & group == groups[g] & scenario == scenarios[s] & draw == i, "sum"] <- sum(dist)
          }
        } 
        if (vars[v] %like% "dead|abst") {
          
          for (i in 1:n_rep){
            dist  <- rbinom(n = N_data[group == groups[g] & scenario == scenarios[s]]$N, size = 1, 
                            prob = input_data[[vars[v]]][groups[g]][[1]][["prop"]])
              
            output[variable == vars[v] & group == groups[g] & scenario == scenarios[s] & draw == i, "mean"] <- mean(dist)
            output[variable == vars[v] & group == groups[g] & scenario == scenarios[s] & draw == i, "var"] <- var(dist)
            output[variable == vars[v] & group == groups[g] & scenario == scenarios[s] & draw == i, "sum"] <- sum(dist)
          }
        }
        
      }
    }
  }
  
  ##  4) Output
  return(output)
  
}

##  2) RUN FUNCTION FOR S25 AND S50 WITH 10000 draws
#   ........................................
##  for "abst" and "dead":
results1   <- DistSample(input_data = input, N_data = geno2, n_rep = 10000, 
                        vars = c("abst","dead"),
                        groups = c("qe","ke"),
                        scenarios = c("baseline", "s25", "s50"),
                        aSeed = 965872)

#results1   <- data.table(read.csv("C:/Data.work/Publications/SATPP_QWT simulation/modelling/R/bootstrapped_s25-s50_dead-abst_190426_10000iterations.csv"))

##  for "hospn" and "hospl":
results2   <- DistSample(input_data = input, N_data = geno2, n_rep = 10000, 
                         vars = c("hospn","hospl"),
                         groups = c("qe","ke"),
                         scenarios = c("baseline", "s25", "s50"),
                         aSeed = 965872)

#results2   <- data.table(read.csv("C:/Data.work/Publications/SATPP_QWT simulation/modelling/R/bootstrapped_s25-s50_hospn-hospl_190426_10000iterations.csv"))

results   <- rbind(results1,results2)

results.all  <- results[, .(group = "all", mean = NA_real_, var = NA_real_, sum = sum(sum)), by = .(draw, variable, scenario )]
results      <- rbind(results.all,results)
rm(results.all)


##  ____________________________________________________________________________
##  ____________________________________________________________________________
##  ____________________________________________________________________________
##  ____________________________________________________________________________

#   ::::::::::::::::::::::::::::::::::::::::
#   ::::::::::::::::::::::::::::::::::::::::
##  GET RESULTS for each outcome:
#   ::::::::::::::::::::::::::::::::::::::::
#   ::::::::::::::::::::::::::::::::::::::::

##  A) MEAN PER SCENARIO AND GROUP
#   ........................................

results.mean  <- results[, .(.N, mean = mean(sum), 
                             lower = quantile(sum, probs = 0.025), 
                             upper = quantile(sum, probs = 0.975)),
                         by = .(variable,group,scenario)][order(variable,group,scenario)]

##  B) ABSOLUTE DIFFERENCES BETWEEN GROUPS
results.diff  <- reshape(results[,.(draw,variable,group,scenario,N=sum)], direction ="wide",v.names = "N", timevar = "scenario", idvar = c("draw","variable","group"))
results.diff[, ':=' (diff.s25 = N.s25 - N.baseline, diff.s50 = N.s50 - N.baseline)]

results.diff  <- results.diff[,.(mean.s25 = mean(diff.s25),
                                 lower.s25 = quantile(diff.s25, probs = 0.025),
                                 upper.s25 = quantile(diff.s25, probs = 0.975),
                                 mean.s50 = mean(diff.s50),
                                 lower.s50 = quantile(diff.s50, probs = 0.025),
                                 upper.s50 = quantile(diff.s50, probs = 0.975)),
                              by = .(variable, group)]

##  C) PROPORTIONAL DIFFERENCES BETWEEN GROUPS
results.prop  <- reshape(results[,.(draw,variable,group,scenario,N=sum)], direction ="wide",v.names = "N", timevar = "scenario", idvar = c("draw","variable","group"))
results.prop[, ':=' (prop.s25 = abs(N.s25 - N.baseline) / N.baseline, prop.s50 = abs(N.s50 - N.baseline) / N.baseline )]
results.prop[, ':=' (prop.s25 = ifelse(N.s25 < N.baseline,-prop.s25,prop.s25),
                     prop.s50 = ifelse(N.s50 < N.baseline,-prop.s50,prop.s50)) ]

results.prop  <- results.prop[,.(mean.s25 = mean(prop.s25),
                                 lower.s25 = quantile(prop.s25, probs = 0.025),
                                 upper.s25 = quantile(prop.s25, probs = 0.975),
                                 mean.s50 = mean(prop.s50),
                                 lower.s50 = quantile(prop.s50, probs = 0.025),
                                 upper.s50 = quantile(prop.s50, probs = 0.975)),
                              by = .(variable, group)]


##  ____________________________________________________________________________
##  ____________________________________________________________________________
##  ____________________________________________________________________________
##  ____________________________________________________________________________

#   ::::::::::::::::::::::::::::::::::::::::
#   ::::::::::::::::::::::::::::::::::::::::
##  PRESENTATION OF RESULTS
#   ::::::::::::::::::::::::::::::::::::::::
#   ::::::::::::::::::::::::::::::::::::::::

##  Reported in Results section
#   ........................................

##  N in Baseline:
geno2[scenario == "baseline" & group == "qe", N] / geno[scenario == "baseline" & group == "all", N]


##  BASELINE:
results.mean[scenario == "baseline"]


##  S25
results.mean[scenario == "s25" & group == "all"]
results.diff[group == "all"]

##  Number of Hospitalisations
results.mean[variable == "hospn"]
results.mean[variable == "hospn"]

results.diff[variable == "hospn" & group == "all", .(mean.s25, lower.s25, upper.s25)]
results.diff[variable == "hospn" & group == "all", .(mean.s50, lower.s50, upper.s50)]

1 - results.mean[variable == "hospn" & group == "all" & scenario == "s25", "mean"] / 
  results.mean[variable == "hospn" & group == "all" & scenario == "baseline", "mean"]
1 - results.mean[variable == "hospn" & group == "all" & scenario == "s50", "mean"] / 
  results.mean[variable == "hospn" & group == "all" & scenario == "baseline", "mean"]


##  Length of Hospitalisations
results.mean[variable == "hospl"]
results.mean[variable == "hospl"]

results.diff[variable == "hospl" & group == "all", .(mean.s25, lower.s25, upper.s25)]
results.diff[variable == "hospl" & group == "all", .(mean.s50, lower.s50, upper.s50)]

1 - results.mean[variable == "hospl" & group == "all" & scenario == "s25", "mean"] / 
  results.mean[variable == "hospl" & group == "all" & scenario == "baseline", "mean"]
1 - results.mean[variable == "hospl" & group == "all" & scenario == "s50", "mean"] / 
  results.mean[variable == "hospl" & group == "all" & scenario == "baseline", "mean"]

##  Number of abstinents
results.mean[variable == "abst"]
results.mean[variable == "abst"]

results.diff[variable == "abst" & group == "all", .(mean.s25, lower.s25, upper.s25)]
results.diff[variable == "abst" & group == "all", .(mean.s50, lower.s50, upper.s50)]

results.mean[variable == "abst" & group == "all" & scenario == "s25", "mean"] / 
  results.mean[variable == "abst" & group == "all" & scenario == "baseline", "mean"]
results.mean[variable == "abst" & group == "all" & scenario == "s50", "mean"] / 
  results.mean[variable == "abst" & group == "all" & scenario == "baseline", "mean"]

##  Number of deaths
results.mean[variable == "dead"]
results.diff[variable == "dead" & group == "all", .(mean.s25, lower.s25, upper.s25)]
results.diff[variable == "dead" & group == "all", .(mean.s50, lower.s50, upper.s50)]
results.prop[variable == "dead" & group == "all", .(mean.s25, lower.s25, upper.s25)]
results.prop[variable == "dead" & group == "all", .(mean.s50, lower.s50, upper.s50)]

1- results.mean[variable == "dead" & group == "all" & scenario == "s25", "mean"] / 
  results.mean[variable == "dead" & group == "all" & scenario == "baseline", "mean"]
1- results.mean[variable == "dead" & group == "all" & scenario == "s50", "mean"] / 
  results.mean[variable == "dead" & group == "all" & scenario == "baseline", "mean"]


##  ____________________________________________________________________________
##  ____________________________________________________________________________
##  ____________________________________________________________________________
##  ____________________________________________________________________________

#   ::::::::::::::::::::::::::::::::::::::::
#   ::::::::::::::::::::::::::::::::::::::::
##  TABLES:
#   ::::::::::::::::::::::::::::::::::::::::
#   ::::::::::::::::::::::::::::::::::::::::

##  N
geno2[group != "all"][order(scenario)]

##  first: means
options(scipen = 999)
tab   <- results.mean[scenario %like% "baseline|^s25|^s50" & group == "all",.(variable,scenario,mean,lower,upper)]
tab$N <- geno2[scenario == "baseline" & group == "all",N]
tab[variable %like% "abst|dead", ':=' (mean = mean / N, lower = lower / N, upper = upper / N)]
tab$N <- NULL
tab   <- dcast(tab, variable ~ scenario, value.var = c("mean","lower","upper") )

var.names   <- names(tab)[names(tab) %like% "mean|lower|upper"]
tab[variable %like% "abst|dead", (var.names) := lapply(.SD, function(x) {(x*100)}), .SDcols = var.names]
tab[, (var.names) := lapply(.SD, function(x) {format(x, digits = 0, nsmall = 0)}), .SDcols = var.names]

add1  <- tab[variable %like% "abst|dead",.(baseline = paste0(mean_baseline,"% (",lower_baseline," to ",upper_baseline,"%)"),
                                           s25 = paste0(mean_s25,"% (",lower_s25," to ",upper_s25,"%)"),
                                           s50 = paste0(mean_s50,"% (",lower_s50," to ",upper_s50,"%)")), by = variable]
add2  <- tab[!variable %like% "abst|dead",.(baseline = paste0(mean_baseline," (",lower_baseline," to ",upper_baseline,")"),
                                           s25 = paste0(mean_s25," (",lower_s25," to ",upper_s25,")"),
                                           s50 = paste0(mean_s50," (",lower_s50," to ",upper_s50,")")), by = variable]
tab.1   <- rbind(add1,add2)

##  add % change
tab.2   <- results.prop[group == "all",]
var.names   <- names(tab.2)[names(tab.2) %like% "mean|lower|upper"]
tab.2[, (var.names) := lapply(.SD, function(x) {format(x*100, digits = 0, nsmall = 0)}), .SDcols = var.names]

add  <- tab.2[,.(s25.prop = paste0(mean.s25,"% (",lower.s25," to ",upper.s25,"%)"),
                 s50.prop = paste0(mean.s50,"% (",lower.s50," to ",upper.s50,"%)")), by = variable]
tab   <- merge(tab.1,add,by = "variable")

tab   <- tab[,.(variable,baseline,s25,s25.prop,s50,s50.prop)]

write.csv(tab, "modelling/R/table 2_main results.csv", row.names = F)


##  ____________________________________________________________________________
##  ____________________________________________________________________________
##  ____________________________________________________________________________
##  ____________________________________________________________________________

#   ::::::::::::::::::::::::::::::::::::::::
#   ::::::::::::::::::::::::::::::::::::::::
##  Figure:
#   ::::::::::::::::::::::::::::::::::::::::
#   ::::::::::::::::::::::::::::::::::::::::

pdat  <- results.prop
pdat  <- melt(pdat, id.vars = c("variable", "group"), variable.name = "scenario")

pdat[, type := ifelse(scenario %like% "mean","mean",ifelse(scenario %like% "lower", "lower","upper"))]
pdat[, scenario := ifelse(scenario %like% "s25","25% of patients receiving QWT","50% of patients receiving QWT")]
pdat[order(variable,group,scenario,type)]
pdat  <- dcast(pdat, variable + group + scenario ~ type, value.var = "value")
levels(pdat$variable)   <- c("Abstainers", "Mortality", "Hospitalisations", "Hospital days")

plot  <- ggplot(pdat[group == "all"], aes(x = variable, y = mean, fill = scenario)) +
  geom_bar(stat = "identity", position = position_dodge(width = 1)) + theme_bw() +
  geom_errorbar(aes(ymin = lower, ymax = upper), position = position_dodge(width = 1)) + 
  scale_fill_manual(name = "", values = c("seagreen3", "firebrick3")) + 
  scale_y_continuous(labels = scales::percent_format(accuracy = 1), name = "Proportional change to baseline") +
  scale_x_discrete(name = "") +
  theme(legend.position="bottom") +
  geom_abline(intercept = 0, slope = 0)
  
ggsave("modelling/R/figure_1.pdf", dpi = 300)
ggsave("modelling/R/figure_1.png")
